# Supplementary material for: Exogenous melatonin improves germination rate in buckwheat under high temperature stress by regulating seed physiological and biochemical characteristics
Source: PeerJ journal article supplement (doi:10.7717/peerj.17136), 2024-04-05
Supplement: Materials.zip [file Materials.zip]

## Sheet: Sheet1
Khth		Measured value	content	average
D2	A1	0.421	5.365	5.20042
	A2	0.405	5.165
	A3	0.3975	5.07125
	B1	0.46025	5.85562	6.21813	19.5697
	B2	0.51275	6.51187
	B3	0.49475	6.28688
	C1	0.48525	6.16812	6.38792	22.8347
	C2	0.50875	6.46188
	C3	0.5145	6.53375
	D1	0.6065	7.68375	7.44833	16.6004
	D2	0.588	7.4525
	D3	0.5685	7.20875
D4	A1	0.59125	7.49313	7.34104
	A2	0.6235	7.89625
	A3	0.5225	6.63375
	B1	0.575	7.29	8.28375	12.8416
	B2	0.69525	8.79312
	B3	0.69325	8.76812
	C1	0.713	9.015	9.11812	24.2075
	C2	0.688	8.7025
	C3	0.76275	9.63687
	D1	0.959	12.09	11.7067	28.389
	D2	0.90375	11.3994
	D3	0.92225	11.6306
D6	A1	0.27725	3.56812	3.20146
	A2	0.21	2.7275
	A3	0.2565	3.30875
	B1	0.27825	3.58062	3.67958	14.9346
	B2	0.309	3.965
	B3	0.27125	3.49312
	C1	0.3975	5.07125	4.95563	54.7927
	C2	0.33725	4.31812
	C3	0.43	5.4775
	D1	0.655	8.29	7.39937	49.3126
	D2	0.59175	7.49937
	D3	0.5045	6.40875
Kbtq
D2	A1	0.178	2.3275	2.33792
	A2	0.20475	2.66188
	A3	0.15375	2.02438
	B1	0.18475	2.41188	2.78167	18.9806
	B2	0.2385	3.08375
	B3	0.21975	2.84938
	C1	0.36125	4.61813	5.13375	119.587
	C2	0.4085	5.20875
	C3	0.43775	5.57437
	D1	0.45625	5.80563	6.03583	17.5716
	D2	0.4825	6.13375
	D3	0.48525	6.16812
D4	A1	0.3605	4.60875	4.15979
	A2	0.31225	4.00563
	A3	0.301	3.865
	B1	0.3503	4.48125	4.98813	19.9129
	B2	0.4025	5.13375
	B3	0.41975	5.34938
	C1	0.575	7.29	7.53375	81.1088
	C2	0.5925	7.50875
	C3	0.616	7.8025
	D1	0.6735	8.52125	8.78812	16.6501
	D2	0.68175	8.62437
	D3	0.7293	9.21875
D6	A1	0.1845	2.40875	2.18271
	A2	0.157	2.065
	A3	0.15775	2.07438
	B1	0.2365	3.05875	3.58687	64.3314
	B2	0.314	4.0275
	B3	0.28575	3.67437
	C1	0.32175	4.12437	4.45771	104.228
	C2	0.35625	4.55563
	C3	0.36725	4.69313
	D1	0.49275	6.26187	6.06333	36.0191
	D2	0.4816	6.1225
	D3	0.45625	5.80563
		0
Zk3h
D2	A1	0.35875	4.58688	4.32958
	A2	0.37925	4.84312
	A3	0.2765	3.55875
	B1	0.4305	5.48375	4.8075	11.0384
	B2	0.3922	5.005
	B3	0.3065	3.93375
	C1	0.41225	5.25563	5.25979	21.4849
	C2	0.43825	5.58062
	C3	0.38725	4.94312
	D1	0.5565	7.05875	6.61892	25.8399
	D2	0.49675	6.31188
	D3	0.51069	6.48612
D4	A1	0.49625	6.30563	6.37854
	A2	0.48575	6.17438
	A3	0.52425	6.65562
	B1	0.55025	6.98062	7.89104	23.7123
	B2	0.6925	8.75875
	B3	0.6265	7.93375
	C1	0.585	7.415	7.61708	19.4173
	C2	0.59225	7.50563
	C3	0.62625	7.93062
	D1	0.84025	10.6056	10.0858	32.4107
	D2	0.7675	9.69625
	D3	0.78825	9.95562
D6	A1	0.397	5.065	5.04104
	A2	0.4365	5.55875
	A3	0.35175	4.49937
	B1	0.43075	5.48688	6.28271	24.6312
	B2	0.494	6.2775
	B3	0.5585	7.08375
	C1	0.5355	6.79625	6.75979	34.0951
	C2	0.4885	6.20875
	C3	0.57375	7.27437
	D1	0.642	8.1275	8.46188	25.1795
	D2	0.69025	8.73062
	D3	0.674	8.5275
		0
Cq8h
D2	A1	0.2345	3.03375	3.09
	A2	0.21575	2.79937
	A3	0.26675	3.43687
	B1	0.2724	3.5075	3.3	6.79612
	B2	0.2565	3.30875
	B3	0.2385	3.08375
	C1	0.35125	4.49313	4.30042	39.1721
	C2	0.3015	3.87125
	C3	0.35475	4.53688
	D1	0.47275	6.01187	5.81083	35.1226
	D2	0.408	5.2025
	D3	0.48925	6.21812
D4	A1	0.4042	5.155	5.51792
	A2	0.42225	5.38063
	A3	0.47325	6.01812
	B1	0.5305	6.73375	6.48017	17.4386
	B2	0.50464	6.4105
	B3	0.4955	6.29625
	C1	0.5249	6.66375	7.12292	29.0871
	C2	0.59475	7.53688
	C3	0.56525	7.16812
	D1	0.6567	8.31125	8.69958	22.1351
	D2	0.69435	8.78187
	D3	0.71225	9.00563
D6	A1	0.36175	4.62437	4.36604
	A2	0.3405	4.35875
	A3	0.321	4.115
	B1	0.44275	5.63687	5.40208	23.7295
	B2	0.39625	5.05563
	B3	0.4329	5.51375
	C1	0.44775	5.69937	5.68375	30.1808
	C2	0.46425	5.90562
	C3	0.4275	5.44625
	D1	0.6695	8.47125	8.24208	45.0114
	D2	0.6465	8.18375
	D3	0.6375	8.07125
Xn9978
D2	A1	0.44075	5.61187	5.91479
	A2	0.4737	6.02375
	A3	0.4805	6.10875
	B1	0.4988	6.3375	6.41667	8.48508
	B2	0.5365	6.80875
	B3	0.4801	6.10375
	C1	0.75825	9.58062	8.715	47.3425
	C2	0.69175	8.74937
	C3	0.617	7.815
	D1	0.76725	9.69313	9.64521	10.6736
	D2	0.782	9.8775
	D3	0.741	9.365
D4	A1	0.5865	7.43375	7.94312
	A2	0.6415	8.12125
	A3	0.65375	8.27438
	B1	0.69625	8.80563	9.1275	14.9107
	B2	0.76625	9.68062
	B3	0.7035	8.89625
	C1	0.7705	9.73375	10.0254	26.215
	C2	0.81325	10.2681
	C3	0.79775	10.0744
	D1	0.937	11.815	12.1369	21.0611
	D2	0.97375	12.2744
	D3	0.9775	12.3213
D6	A1	0.632	8.0025	8.25771
	A2	0.60925	7.71812
	A3	0.716	9.0525
	B1	0.72775	9.19937	8.55875	3.64558
	B2	0.6675	8.44625
	B3	0.63425	8.03062
	C1	0.73175	9.24938	9.53271	15.4401
	C2	0.77375	9.77438
	C3	0.75775	9.57437
	D1	0.9255	11.6713	11.5421	21.0787
	D2	0.8915	11.2462
	D3	0.9285	11.7088
